# Supplementary material
Source: PubMed Central journal article supplement (PMC3848405)

Supplemental data to

**Association of left atrial diameter with survival among renal allograft recipients**

A Kainz, G Goliash, F Wiesbauer, T Binder, G Maurer, HJ Nesser,  
R Mascherbauer, C Ebner, R Kramar, J Wilflingseder,  
R Oberbauer

**Supplemental table 1.** Comparing demographics between study cohort and subjects without echocardiographic evaluation.

| variable                          | population without | population with  | p-value |
|-----------------------------------|--------------------|------------------|---------|
|                                   | echocardiography   | echocardiography |         |
|                                   | n=2406             | n=553            |         |
| Deaths per 100 PYR                | 3.86               | 2.61             | n.a.    |
| Functional graft loss per 100 PYR | 3.82               | 3.24             | n.a.    |
| donor age (years)                 | 40 (22)            | 46 (15)          | <0.001  |
| donor last creatinine (mg/dl)     | 1.0 (0.7)          | 1.0 (0.4)        | 0.57    |
| recipient sex (female)            | 887 (36.9%)        | 230 (41.6%)      | 0.04    |
| renal diagnosis                   |                    |                  | 0.05    |
| glomerular nephritis              | 565 (23.5%)        | 126 (22.8%)      |         |
| vascular                          | 205 (8.5%)         | 47 (8.5%)        |         |
| diabetes                          | 235 (9.8%)         | 76 (13.7%)       |         |
| else                              | 1401 (58.2%)       | 304 (55.0%)      |         |
| immunosuppression                 |                    |                  | 0.53    |
| standard                          | 1005 (41.8%)       | 222 (40.1%)      |         |
| steroidfree                       | 118 (4.9%)         | 23 (4.2%)        |         |
| else                              | 1283 (53.3%)       | 308 (55.7%)      |         |
| cerebro vascular disease          | 116 (4.8%)         | 27 (4.9%)        | 0.43    |
| peripher vascular disease         | 184 (7.6%)         | 72 (13.0%)       | <0.001  |
| coronary heart disease            | 246 (10.2%)        | 81 (14.6%)       | <0.001  |
| diabetes                          | 222 (9.2%)         | 99 (17.9%)       | <0.001  |
| cause of death                    |                    |                  | 0.21    |
| cardio vascular                   | 180 (7.5%)         | 50 (9.0%)        |         |
| infection                         | 139 (5.8%)         | 22 (4.0%)        |         |
| malign                            | 43 (1.8%)          | 9 (1.6%)         |         |
| else                              | 127 (5.3%)         | 25 (4.5%)        |         |

| variable                            | population without | population with   | p-value |
|-------------------------------------|--------------------|-------------------|---------|
|                                     | echocardiography   | echocardiography  |         |
|                                     | n=2406             | n=553             |         |
| donor type                          |                    |                   | 0.005   |
| deceased                            | 2079 (86.4%)       | 500 (90.4%)       |         |
| living                              | 327 (13.6%)        | 53 (9.6%)         |         |
| ASR                                 | 523 (21.7%)        | 189 (34.2%)       | <0.001  |
| MMA                                 | 1 (0, 1)           | 1 (0, 1)          | 0.02    |
| MMB                                 | 1 (0, 1)           | 1 (0, 1)          | 0.002   |
| MMDR                                | 1 (0, 1)           | 1 (0, 1)          | 0.39    |
| sum of HLA mismatch                 | 2 (0, 3)           | 3 (2, 3)          | <0.001  |
| panel reactive antibody (%)         | 0 (0, 2)           | 0 (0, 2)          | 0.18    |
| maximal panel reactive antibody (%) | 0 (0, 10)          | 4 (0, 12)         | 0.01    |
| age at transplantation (years)      | 49 (16)            | 52 (13)           | <0.001  |
| year of transplantation             | 2001 (1996, 2005)  | 2000 (1996, 2003) | <0.001  |
| ALAT (units/l)                      | 12 (7, 19)         | 10 (7, 16)        | 0.004   |
| ASAT (units/l)                      | 14 (7, 22)         | 10 (6, 17)        | <0.001  |
| albumin (g/l)                       | 39 (33, 44)        | 39 (32, 44)       | 0.79    |
| BUN (mg/dl)                         | 45 (18)            | 46 (18)           | 0.22    |
| C-reactive protein (mg/dl)          | 0.7 (0, 1.6)       | 0.7 (0, 1.8)      | 0.38    |
| cholesterol (mg/dl)                 | 159 (46)           | 162 (51)          | 0.31    |
| creatinine (mg/dl)                  | 6.7 (3.0)          | 7.0 (2.8)         | 0.07    |
| iron (µg/dl)                        | 61 (36)            | 58 (34)           | 0.26    |
| ferritin (ng/ml)                    | 251 (131, 443)     | 209 (98, 353)     | 0.04    |
| hemoglobin (g/dl)                   | 11.4 (1.7)         | 11.3 (1.7)        | 0.39    |
| hematocrit (%)                      | 34 (5)             | 34 (5)            | 0.42    |
| HbA1c (%)                           | 6.0 (5.5, 6.4)     | 6.2 (5.6, 6.6)    | 0.03    |
| potassium (mmol/l)                  | 4.7 (0.7)          | 4.8 (0.7)         | 0.65    |
| sodium (mmol/l)                     | 139 (137, 141)     | 139 (137, 141)    | 0.68    |
| proteinuria (mg/mmol crea)          | 1 (0, 1)           | 1 (0, 2)          | 0.09    |
| serum transferrin (mg/dl)           | 178 (43)           | 176 (46)          | 0.55    |
| total plasma protein (g/dl)         | 61 (22)            | 60 (23)           | 0.44    |
| transferrin saturation (%)          | 24 (17, 34)        | 25 (17, 32)       | 0.95    |

Values represent count (percentage), mean (standard deviation) or median (25th, 75th percentile). PYR, person year; standard immunosuppression regimen: steroid +

mycophenolat + calcineurin inhibitors; ASR, acute systemic rejection; BUN, blood urea nitrogen

## Univariate models

**Supplemental table 2.** Hazard ratio and 95% confidence interval of echo parameters and demographic parameters in univariate models.

| <b>parameter</b>                             | <b>HR</b> | <b>95% CI</b> |      | <b>p-value</b> |
|----------------------------------------------|-----------|---------------|------|----------------|
| <i>outcome mortality (n=106)</i>             |           |               |      |                |
| LA2D (per mm)                                | 1.06      | 1.04          | 1.08 | <0.001         |
| LV2D (per mm)                                | 1.00      | 0.95          | 1.05 | 0.92           |
| RA2D (per mm)                                | 1.06      | 1.03          | 1.08 | <0.001         |
| RV2D (per mm)                                | 1.02      | 0.97          | 1.07 | 0.43           |
| LVF (<50% vs. >50%)                          | 0.96      | 0.10          | 8.95 | 0.97           |
| age at transplantation (per year)            | 1.04      | 1.02          | 1.06 | <0.001         |
| diabetes (yes vs. no)                        | 2.88      | 1.94          | 4.27 | <0.001         |
| vintage of dialysis (per year)               | 1.01      | 0.94          | 1.09 | 0.76           |
| donor age (per year)                         | 1.00      | 0.99          | 1.02 | 0.48           |
| cholesterol (per mg/dl)                      | 1.00      | 0.99          | 1.00 | 0.45           |
| hemoglobin (per g/dl)                        | 0.83      | 0.74          | 0.92 | <0.001         |
| sum of HLA mismatch                          | 1.03      | 0.89          | 1.20 | 0.68           |
| use of CNI (yes vs. no)                      | 1.11      | 0.53          | 2.33 | 0.77           |
| mean arterial bloodpressure (per 5 mmHg)     | 1.00      | 0.94          | 1.06 | 0.98           |
| cerebro vascular disease (yes vs. no)        | 0.99      | 0.35          | 2.81 | 0.99           |
| peripher vascular disease (yes vs. no)       | 4.88      | 2.69          | 8.84 | <0.001         |
| <i>outcome functional graft loss (n=119)</i> |           |               |      |                |
| LA2D (per mm)                                | 1.02      | 1.00          | 1.04 | 0.12           |

| <b>parameter</b>                         | <b>HR</b> | <b>95% CI</b> | <b>p-value</b> |
|------------------------------------------|-----------|---------------|----------------|
| LV2D (per mm)                            | 1.01      | 0.98 1.04     | 0.45           |
| RV2D (per mm)                            | 1.02      | 0.98 1.07     | 0.32           |
| RA2D (per mm)                            | 1.03      | 1.00 1.05     | 0.05           |
| LVF (<50% vs. >50%)                      | 2.00      | 0.67 5.93     | 0.18           |
| age at transplantation (per year)        | 0.99      | 0.97 1.00     | 0.04           |
| diabetes (yes vs. no)                    | 1.61      | 1.06 2.45     | 0.03           |
| vintage of dialysis (per year)           | 0.99      | 0.91 1.07     | 0.78           |
| donor age (per year)                     | 1.01      | 1.00 1.03     | 0.03           |
| cholesterol (per mg/dl)                  | 0.99      | 0.99 1.00     | 0.004          |
| hemoglobin (per g/dl)                    | 0.72      | 0.65 0.80     | <0.001         |
| sum of HLA mismatch                      | 1.09      | 0.95 1.26     | 0.23           |
| use of CNI (yes vs. no)                  | 0.84      | 0.48 1.45     | 0.52           |
| mean arterial bloodpressure (per 5 mmHg) | 1.01      | 0.98 1.05     | 0.44           |
| cerebro vascular disease (yes vs. no)    | 1.76      | 0.57 5.38     | 0.27           |
| peripher vascular disease (yes vs. no)   | 1.30      | 0.73 2.32     | 0.34           |

HR, hazard ratio; 95% CI, 95% confidence interval; LA2D, left atrial diameter; LV2D, left ventricular diameter; RV2D, right ventricular diameter; RA2D, right atrial diameter; LVF, left ventricular function; CNI, calcineurin inhibitor

## Mortality

**Supplemental table 3.** Multivariate Cox model with year of transplantation added, which was not included by the purposeful selection algorithm.

| parameter                              | HR   | 95% CI |      | p-value |
|----------------------------------------|------|--------|------|---------|
| <i>outcome mortality (n=106)</i>       |      |        |      |         |
| LA2D (per mm)                          | 1.06 | 1.03   | 1.08 | <0.001  |
| RV2D (per mm)                          | 0.96 | 0.90   | 1.02 | 0.14    |
| hemoglobin (per g/dl)                  | 0.81 | 0.71   | 0.92 | 0.001   |
| peripher vascular disease (yes vs. no) | 4.57 | 2.16   | 9.69 | <0.001  |
| immunosuppression (any vs. standard)   | 1.47 | 0.68   | 3.16 | 0.31    |
| immunosuppression (AZA vs MMF)         | 1.29 | 0.62   | 2.67 | 0.48    |
| CNI use (yes vs. no)                   | 1.51 | 0.51   | 4.43 | 0.43    |
| year of transplantation                | 0.97 | 0.91   | 1.04 | 0.43    |

HR, hazard ratio; 95% CI, 95% confidence interval; LA2D, left atrial diameter; RV2D, right ventricular diameter; AZA, azathioprine; MMF, mycophenolate; CNI, calcineurin inhibitor; standard immunosuppression regimen: steroid + MMF + CNI

**Supplemental table 4.** Hazard ratio and 95% confidence interval for mortality in a cause specific model and a competing risk model (Fine and Gray model). In these analyses only cardiac death was counted as event.

| parameter                              | HR   | 95% CI |      | p-value |
|----------------------------------------|------|--------|------|---------|
| <i>Mortality (cause specific)</i>      |      |        |      |         |
| LA2D (per mm)                          | 1.05 | 1.01   | 1.10 | 0.01    |
| RV2D (per mm)                          | 0.97 | 0.90   | 1.05 | 0.48    |
| <i>Mortality (Fine and Gray model)</i> |      |        |      |         |
| LA2D (per mm)                          | 1.04 | 1.00   | 1.08 | 0.04    |
| RV2D (per mm)                          | 0.98 | 0.91   | 1.06 | 0.64    |

HR, hazard ratio; 95% CI, 95% confidence interval; LA2D, left atrial diameter; RV2D, right ventricular diameter

**Supplemental figure 1a.** Kaplan-Meier plot for mortality stratified by LA2D median and censored graft loss.

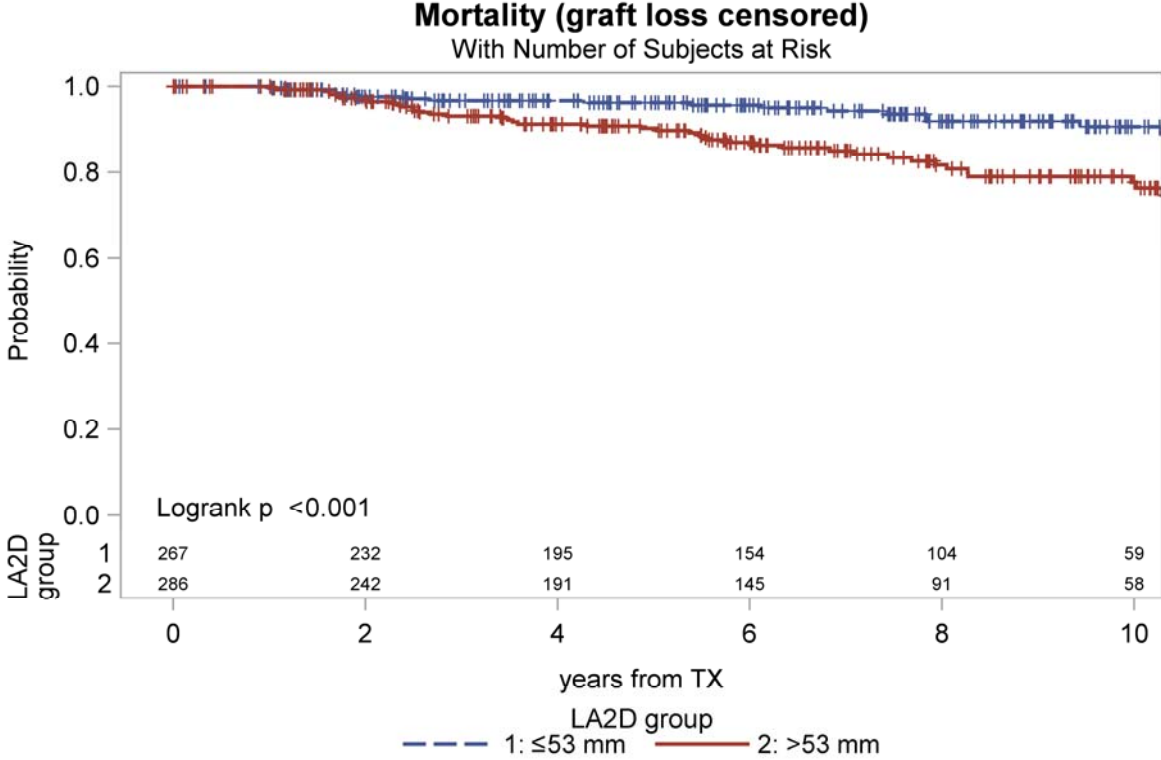

**Supplemental figure 1b.** Kaplan-Meier plot of mortality stratified by LA2D median (53 mm). In this plot also patients who died in the first year are included.

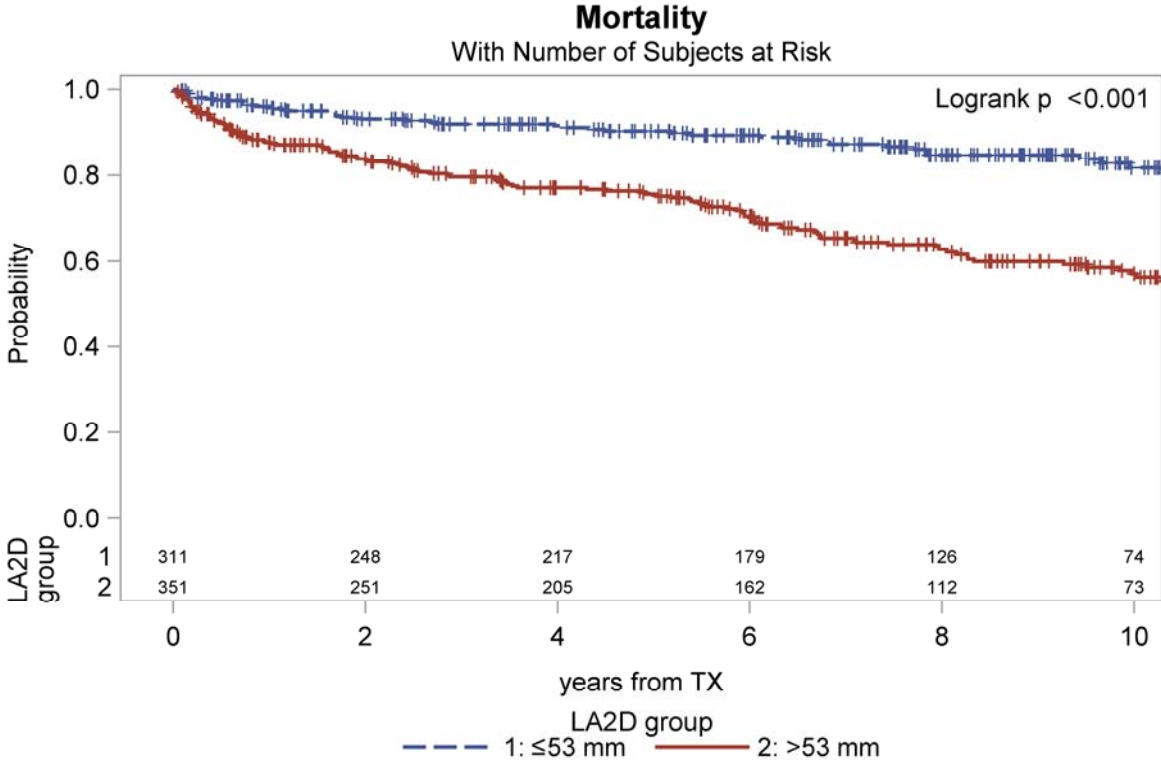

**Supplemental figure 2.** Log hazard ratio for left atrial diameter as a spline curve in the model for mortality. There is no non-linearity evident. Therefore we used the linear model for further evaluation.

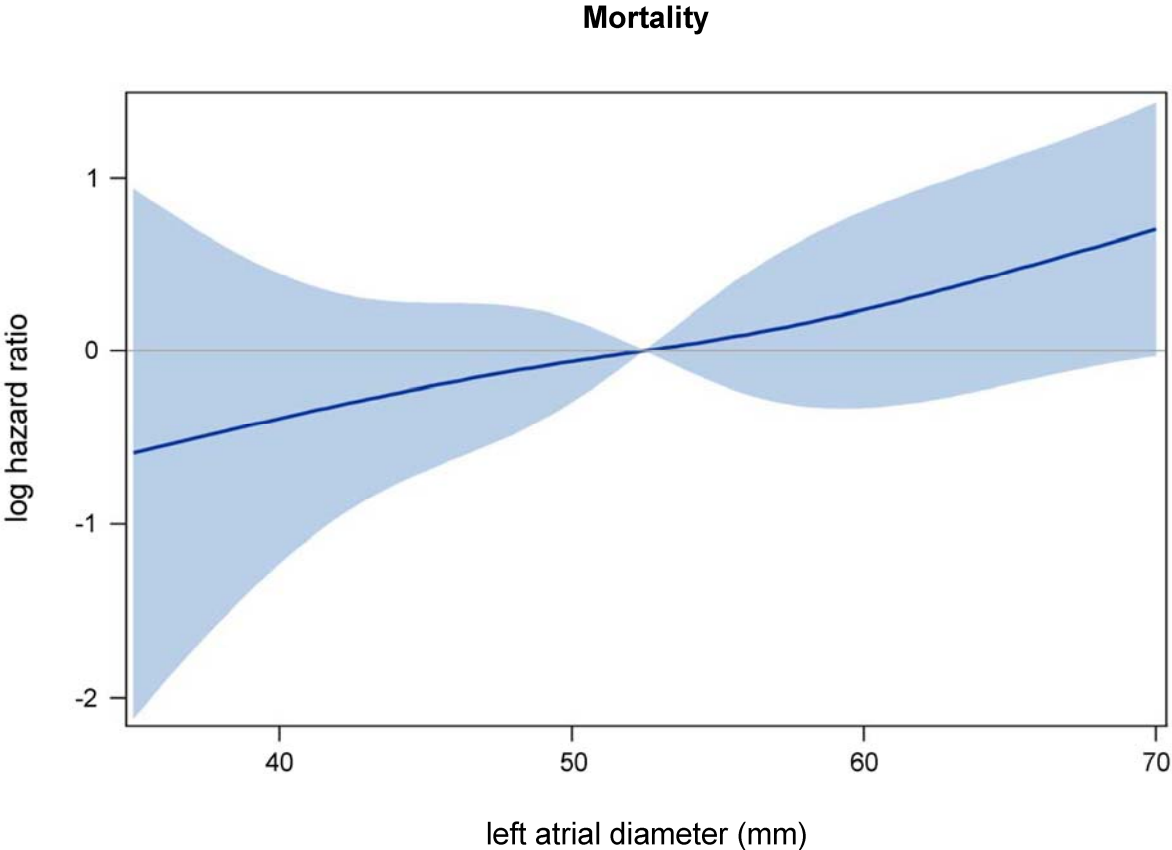

Supplement: CJN.04300413_CJN04300413SupplementaryData.pdf [file CJN.04300413_CJN04300413SupplementaryData.pdf]
